# Supplementary material
Source: PubMed Central journal article supplement (PMC2878080)
Supplement: supp_M110.107953_jbc.M110.107953-1.pdf [file supp_M110.107953_jbc.M110.107953-1.pdf]

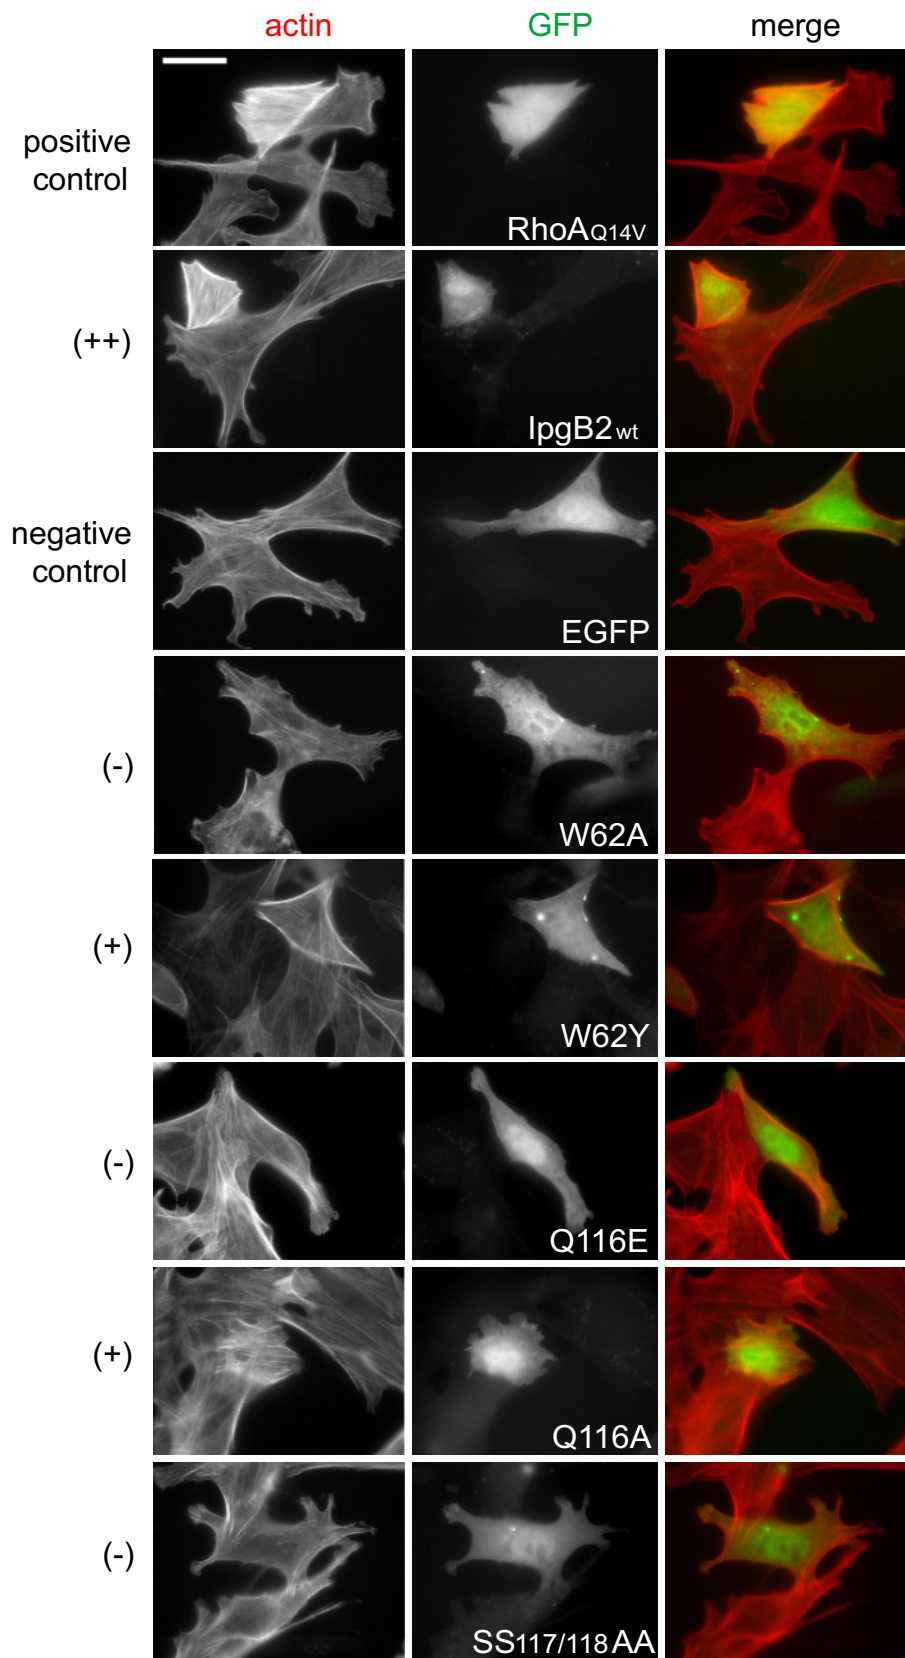

**Supplementary Figure 1:** Expression levels of EGFP-tagged constructs in representative cells as shown in Figure 4. Actin (red in merges) and EGFP (green in merges) and merges are shown as indicated. Respective constructs and classifications are as in Figure 4I. Bar equals 25  $\mu$ m.
