# Supplementary material
Source: PubMed Central journal article supplement (PMC2878080)
Supplement: supp_M110.107953_jbc.M110.107953-3.pdf [file supp_M110.107953_jbc.M110.107953-3.pdf]

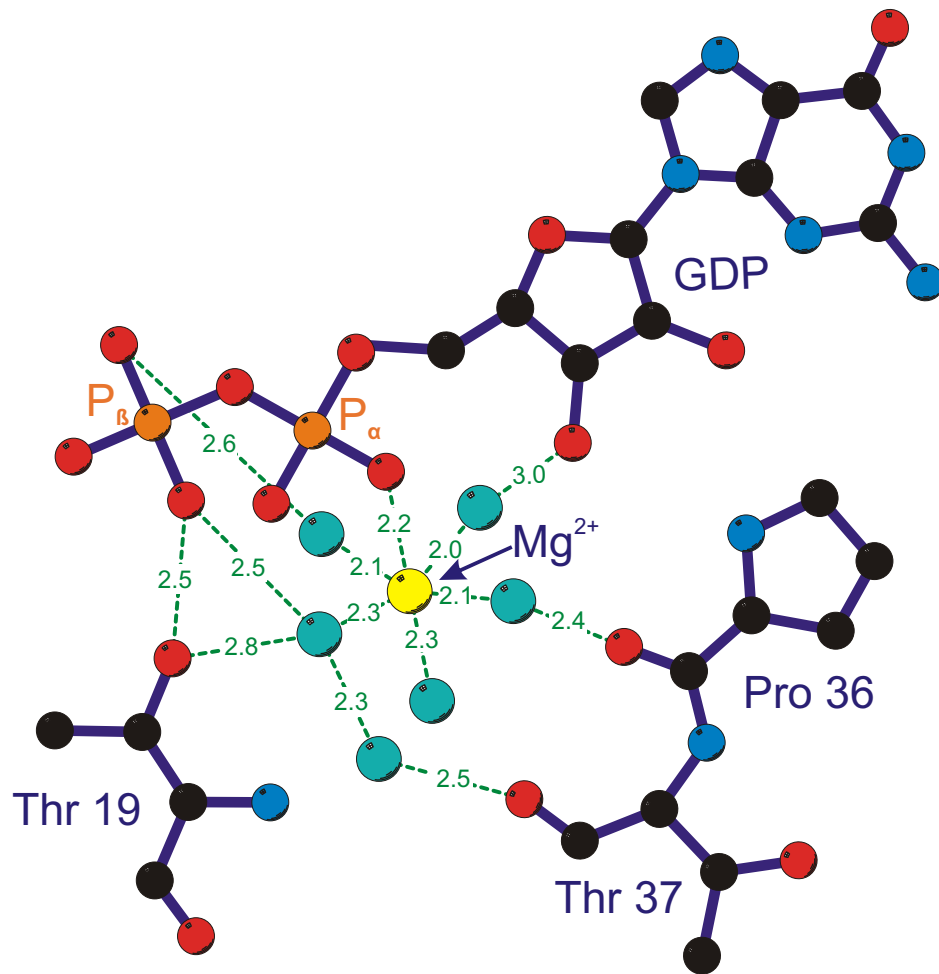

**Supplementary Figure 3:** Schematic representation of the nucleotide binding site in complex B. The  $Mg^{2+}$  ion bound to the  $\alpha$ -phosphate of GDP, its water coordination sphere and water-mediated interactions with RhoA residues are shown.
