# Supplementary material
Source: PubMed Central journal article supplement (PMC2878080)
Supplement: supp_M110.107953_jbc.M110.107953-4.pdf [file supp_M110.107953_jbc.M110.107953-4.pdf]

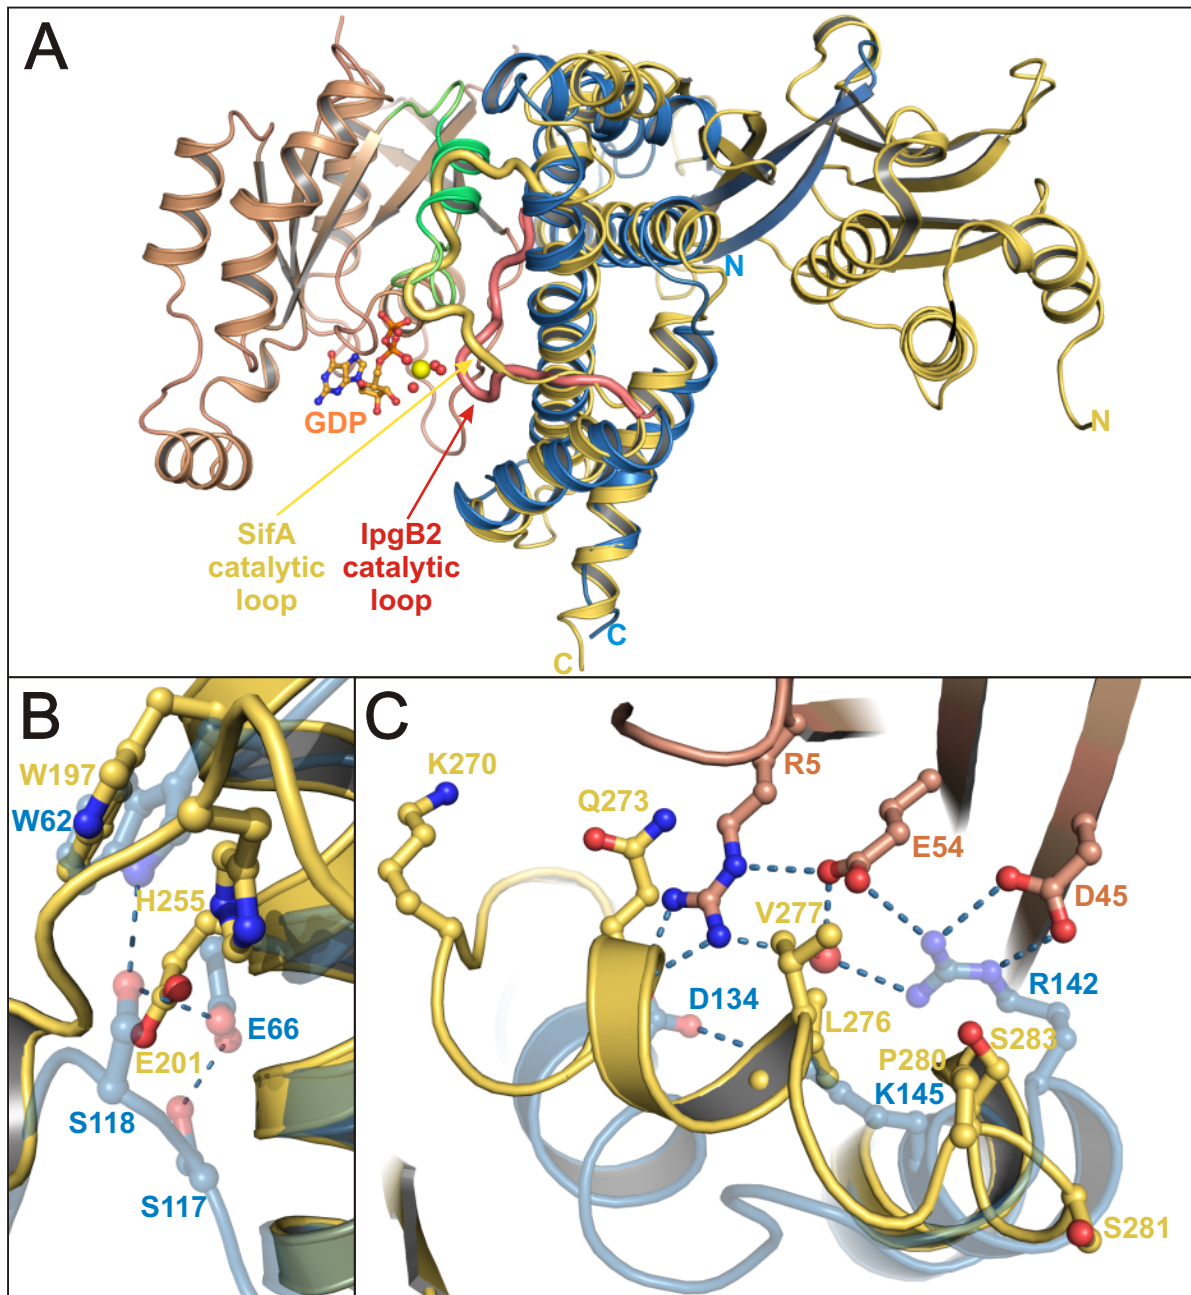

**Supplementary Figure 4:** (A) Overlay of IpgB2/RhoA complex B with SifA (30). IpgB2 and SifA are shown as blue and yellow cartoon, with the catalytic loops marked as thick red and yellow loop, respectively. RhoA GDP is shown in brown, the switch II region in green. GDP is shown as orange balls and sticks, the Mg ion and water molecules as yellow and red spheres, respectively. (B): Interactions of the WxxxE motif with residues of the catalytic loop; (C): The region interacting with the specificity-determining region ( $\beta$ 123).
